# Supplementary material for: A simple nickel bis(dithiolene) complex as an excellent n-type molecular semiconductor for field-effect transistors
Source: Royal Society of Chemistry journal article supplement (doi:10.1039/c2cc33445c), 2012-01-01
Supplement: c2cc33445c.pdf [file c2cc33445c.pdf]

## Electronic Supplementary Information

### A Simple Nickel Bis(Dithiolene) Complex as an Excellent n-Type Molecular Semiconductor for Field-Effect Transistors

Li Qu,<sup>a</sup> Yunlong Guo,<sup>b</sup> Hao Luo,<sup>b</sup> Cheng Zhong,<sup>a</sup> Gui Yu,<sup>b</sup> Yunqi Liu,<sup>\*b</sup> and Jingui Qin<sup>\*a</sup>

<sup>a</sup> *Department of Chemistry and Hubei Key Lab on Organic and Polymeric Optoelectronic Materials, Wuhan University, Wuhan 430072, P. R. China, E-mail: jgqin@whu.edu.cn*

<sup>b</sup> *Beijing National Laboratory for Molecular Sciences and CAS Key Laboratory of Organic Solids, Institute of Chemistry, Chinese Academy of Sciences, Beijing 100190, P. R. China, E-mail: liuyq@iccas.ac.cn*

#### ***Table of Contents***

1. Instruments
2. Synthesis and characterization data of **1**
3. Basic physical properties of **1**
4. DFT calculations of **1**
5. Selected crystal structure data
6. FET fabrication and characterization of **1**
7. Stability testing of **1**
8. AFM image and XRD pattern of thin film of **1**

## 1. Instruments

$^1\text{H}$  NMR spectroscopies were conducted with a Varian Mercury300 spectrometer using tetramethylsilane (TMS;  $\delta=0$  ppm) as an internal standard. EI-MS was carried out by Finnigan Trance mass spectrometer. Elemental analysis was performed by Vario EL III (German). Thermal analysis was performed on a Netzsch STA449C thermal analyzer at a heating rate of  $10\text{ }^\circ\text{C min}^{-1}$  in nitrogen at a flow rate of  $50\text{ cm}^3\text{ min}^{-1}$  for thermogravimetric analysis (TGA). UV-visible spectra were obtained using a Shimadzu UV- 2550 spectrometer. Cyclic voltammetry (CV) was carried out on a CHI voltammetric analyzer in a three-electrode cell with a Pt counter electrode, a Ag/AgCl reference electrode, and a glassy carbon working electrode at a scan rate of  $10\text{ mV/s}$ . The film morphology was analyzed in air using a Nanoscope III atomic force microscope (Digital Instruments) operated in tapping mode. XRD of thin films was performed in the reflection mode at 40 kV and 200 mA with Cu K $\alpha$  radiation using a 2 kW Rigaku D/max-2500 X-ray diffractometer. Measurements of electric properties were carried out at room temperature using a Keithley 4200 SCS semiconductor parameter analyzer.

## 2. Synthesis and characterization data of 1

The synthetic route of complex **1** is shown in **Scheme S1**. Potassium O-isopropylxanthate and compound **2** were synthesized according to the literature methods.

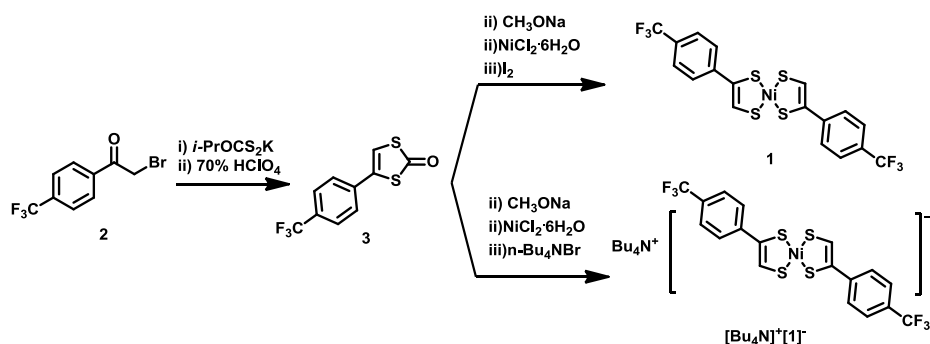

**Scheme S1.** Synthesis of **1** and  $[\text{Bu}_4\text{N}]^+[\mathbf{1}]^-$

*Synthesis of 4-(4-(trifluoromethyl)phenyl)-1,3-dithiol-2-one (3):* Compound **2** (5.61 g, 20 mmol) and potassium O-isopropylxanthate (3.51 g, 20 mmol) were dissolved in 50

ml acetone, reflux for 1 h. The mixture was cooled to room temperature, filtered and washed with chloroform. The filtrates were combined and removed in vacuum, producing the crude intermediate. Then it was re-dissolved in 30 ml chloroform and 70% perchloric acid (4 ml) was added dropwise. The mixture was then refluxed for 6 h. The resulting dark product was poured into ice–water followed by extraction with chloroform. The combined extract was dried with anhyd.  $\text{Na}_2\text{SO}_4$ , then chromatographed on a silica gel (eluent: petroleum: chloroform = 4: 1), affording a pale yellow solid (3.4 g, overall yield 61.6%).  $^1\text{H}$  NMR (300Hz,  $\text{CDCl}_3$ )  $\delta$  6.99(1H, s), 7.55(2H, d), 7.68(2H, d).

*Synthesis of 1:* At room temperature, compound **3** (1.05 g, 4.0 mmol) and sodium methoxide (1.08 g, 20 mmol) were suspended in 20 ml degassed methanol and stirred under argon for 1 h, affording an orange solution. A 6 ml methanol solution of  $\text{NiCl}_2 \cdot 6\text{H}_2\text{O}$  (0.47 g, 2.0 mmol) was added, and the resulting reaction mixture was stirred for 0.5 h. Then a 6 ml acetonitrile solution of  $\text{I}_2$  (1.03 g, 4.0 mmol) was added in air, and the reaction mixture was continuous stirred for 0.5 h resulting in the formation of a dark green precipitate. The target product was obtained by filtration and recrystallization from chloroform (0.56 g, yield 53.3%).  $^1\text{H}$  NMR (300Hz,  $\text{CDCl}_3$ )  $\delta$  7.12(4H, d), 8.10(4H, d), 9.77(2H, s). MS (EI)  $m/z$ : 525.9 ( $\text{M}^+$ ). Anal. Calcd. for  $\text{C}_{18}\text{H}_{10}\text{F}_6\text{NiS}_4$ : C, 41.01; H, 1.91. Found: C, 41.28; H, 1.64 (%). (Note:  $^{13}\text{C}$  NMR signal cannot be obtained due to the low solubility of complex **1**.)

*Synthesis of  $[\text{Bu}_4\text{N}]^+[\text{I}]^-$ :* At room temperature, compound **3** (0.79 g, 3.0 mmol) and sodium methoxide (0.81 g, 15 mmol) were suspended in 20 ml degassed methanol and stirred under argon for 1 h, affording an orange solution. A 6 ml methanol solution of  $\text{NiCl}_2 \cdot 6\text{H}_2\text{O}$  (0.35 g, 1.5 mmol) was added, and the resulting reaction mixture was stirred for 0.5 h. Then a 6 ml methanol solution of  $n\text{-Bu}_4\text{NBr}$  (0.96 g, 3.0 mmol) was added in air, and the reaction mixture was continuous stirred for 0.5 h. Then it was concentrated to about 5 ml, affording the dark red precipitate. The target product was obtained by filtration and washed with water and methanol (0.30 g, yield 26.1%). Anal. Calcd. for  $\text{C}_{34}\text{H}_{46}\text{F}_6\text{NNiS}_4$ : C, 53.06; H, 6.02; N, 1.82. Found: C, 53.38; H, 6.52; N, 1.45 (%).

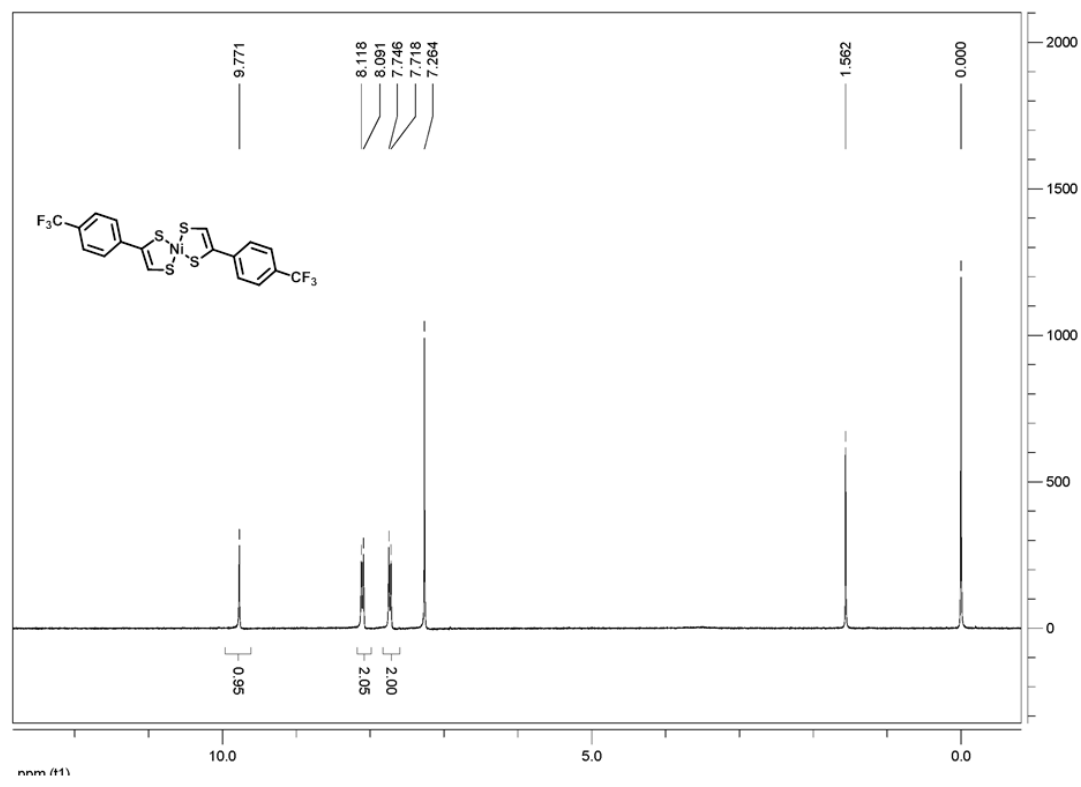

**Figure S1.** <sup>1</sup>H NMR spectra of complex **1**

### 3. Basic physical properties of **1**

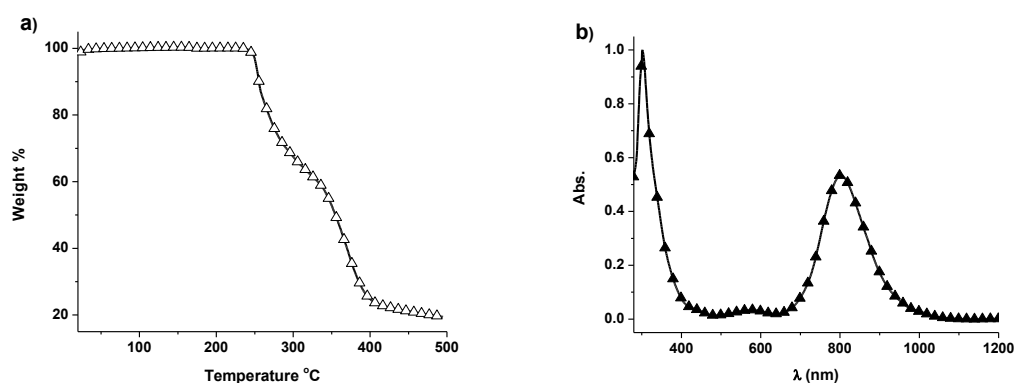

**Figure S2.** a) Thermogravimetric analysis. b) Normalized UV-Vis-NIR absorption spectra in chloroform

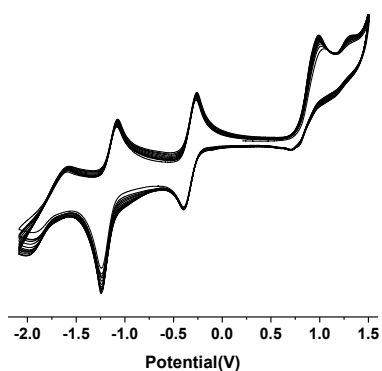

**Figure S3.** Cyclic voltammograms of **1** in dichloromethane solution containing 0.1 M  $\text{Bu}_4\text{NPF}_6$  with repeated scan for 10 cycles, the potential values obtained were converted to the values versus the ferrocenium/ferrocene ( $\text{Fc}^+/\text{Fc}$ ) standard.

**Table S1** Relevant data of basic physical properties of **1**

|          | $T_{\text{dep}}^a$ (°C) | $\lambda_{\text{max}}^b$ (nm) | HOMO <sup>c</sup> (eV) | LUMO <sup>c</sup> (eV) | $\Delta E_{\text{g}}^{\text{el } c}$ (eV) |
|----------|-------------------------|-------------------------------|------------------------|------------------------|-------------------------------------------|
| <b>1</b> | 252                     | 302, 804                      | -5.59                  | -4.51                  | 1.08                                      |

<sup>a</sup> Calculated from TGA of 5% weight loss. <sup>b</sup> Measured in  $10^{-5}$  M chloroform. <sup>c</sup> Calculated from CV results, the unit of potential is versus the ferrocenium/ferrocene ( $\text{Fc}^+/\text{Fc}$ ) standard.

#### 4. DFT calculations of **1**

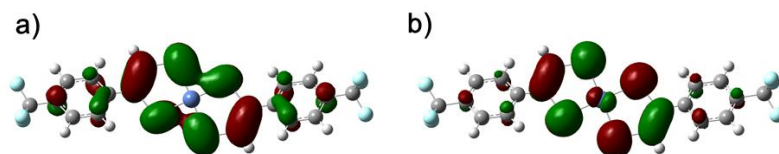

**Figure S4.** Electron-density-distribution of a) HOMO and b) LUMO of **1**

**Table S2** Calculation data for reorganization energy of **1**

|          | $E^0(g^0)$ | $E^0(g^a)$ | $E^0(g^c)$ | $E^a(g^0)$ | $E^a(g^a)$ | $E^c(g^0)$ | $E^c(g^c)$ | $\lambda_e$ | $\lambda_h$ |
|----------|------------|------------|------------|------------|------------|------------|------------|-------------|-------------|
| <b>1</b> | -3053.625  | -3053.747  | -3053.350  | -3053.622  | -3053.751  | -3053.620  | -3053.355  | 0.20        | 0.27        |

#### 5. Selected crystal structure data

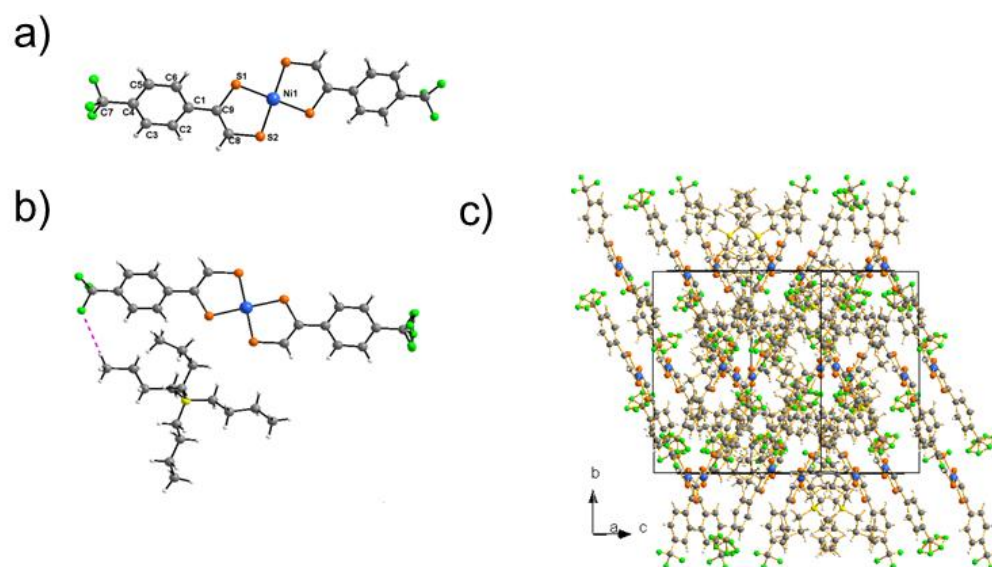

**Figure S5.** a) Crystal structure of **1** with labelled atoms. b, c) Crystal structure of  $[\text{Bu}_4\text{N}]^+[\mathbf{1}]^-$

**Table S3.** Summary of Crystal Structures data of **1** and [Bu<sub>4</sub>N]<sup>+</sup>[**1**]<sup>-</sup>

|                                            | <b>1</b>                                                        | [Bu <sub>4</sub> N] <sup>+</sup> [ <b>1</b> ] <sup>-</sup>       |
|--------------------------------------------|-----------------------------------------------------------------|------------------------------------------------------------------|
| CCDC No.                                   | 836362                                                          | 836363                                                           |
| Chemical Formula                           | C <sub>18</sub> H <sub>10</sub> F <sub>6</sub> NiS <sub>4</sub> | C <sub>34</sub> H <sub>46</sub> F <sub>6</sub> NNiS <sub>4</sub> |
| Formular Weight                            | 527.21                                                          | 769.67                                                           |
| Temperature                                | 293                                                             | 293                                                              |
| Space Group                                | P2(1)/c                                                         | C2/c                                                             |
| Unit Cell Lengths(Å)                       | a = 11.924                                                      | a = 27.357                                                       |
|                                            | b = 9.3396                                                      | b = 17.901                                                       |
|                                            | c = 8.7683                                                      | c = 16.611                                                       |
|                                            | α = 90                                                          | α = 90                                                           |
| Unit Cell Angles(°)                        | β = 91.294                                                      | β = 103.722                                                      |
|                                            | γ = 90                                                          | γ = 90                                                           |
|                                            | 976.2                                                           | 7545                                                             |
| Cell Volume (Å <sup>3</sup> )              | 976.2                                                           | 7545                                                             |
| Z, Calculated Density(g cm <sup>-3</sup> ) | 2, 1.794                                                        | 8, 1.355                                                         |
| F <sub>000</sub>                           | 528.0                                                           | 3224.0                                                           |
| Reflections collected / unique             | 5278/1918                                                       | 16866/5624                                                       |
|                                            | [R(int) = 0.0232]                                               | [R(int) = 0.0669]                                                |
| R(reflections)                             | 0.0604                                                          | 0.0509                                                           |
| wR2(reflections)                           | 0.1760                                                          | 0.1261                                                           |
| Goodness-Of-Fit on F <sup>2</sup>          | 1.063                                                           | 1.020                                                            |

**Table S4.** Selected bond lengths and angles as well as dihedral angles of **1** and [Bu<sub>4</sub>N]<sup>+</sup>[**1**]<sup>-a</sup>

|                                 | In <b>1</b>  | In [Bu <sub>4</sub> N] <sup>+</sup> [ <b>1</b> ] <sup>-b</sup> |
|---------------------------------|--------------|----------------------------------------------------------------|
| <b>Bond Length(Å)</b>           |              |                                                                |
| Ni(1)-S(1)                      | 2.1339(11)   | 2.1372(14), 2.1468(14)                                         |
| Ni(1)-S(2)                      | 2.1144(12)   | 2.1366(14), 2.1298(14)                                         |
| C(9)-S(1)                       | 1.7059(46)   | 1.7291(50), 1.7305(49)                                         |
| C(8)-S(2)                       | 1.6867(48)   | 1.7004(50), 1.6993(50)                                         |
| C(8)-C(9)                       | 1.3670(69)   | 1.3525(73), 1.3538(73)                                         |
| C(1)-C(9)                       | 1.4793(65)   | 1.4692(70), 1.4647(68)                                         |
| C(1)-C(2)                       | 1.3858(71)   | 1.3750(72), 1.3564(74)                                         |
| C(1)-C(6)                       | 1.3896(67)   | 1.3880(72), 1.3909(73)                                         |
| C(2)-C(3)                       | 1.3777(80)   | 1.3814(82), 1.3737(73)                                         |
| C(3)-C(4)                       | 1.3711(81)   | 1.3595(83), 1.3828(76)                                         |
| C(4)-C(5)                       | 1.3893(74)   | 1.3621(74), 1.3578(78)                                         |
| C(5)-C(6)                       | 1.3710(69)   | 1.3754(73), 1.3733(71)                                         |
| C(4)-C(7)                       | 1.4944(79)   | 1.4803(89), 1.5020(88)                                         |
| <b>Bond Angles(°)</b>           |              |                                                                |
| S(2)-Ni(1)-S(1)                 | 91.721(44)   | 91.265(54), 91.383(54)                                         |
| S(1)-Ni(1)-S(2) #1 <sup>c</sup> | 88.279(44)   | 88.346(55), 89.085(55)                                         |
| C(9)-S(1)-Ni(1)                 | 104.739(162) | 104.982(176), 104.694(175)                                     |
| C(8)-S(2)-Ni(1)                 | 104.076(166) | 104.142(176), 103.959(176)                                     |
| C(8)-C(9)-S(1)                  | 117.723(359) | 117.755(370), 117.277(369)                                     |
| C(1)-C(9)-S(1)                  | 119.897(328) | 118.523(357), 119.590(353)                                     |
| C(9)-C(8)-S(2)                  | 121.740(374) | 121.804(403), 122.401(402)                                     |
| C(6)-C(1)-C(9)                  | 121.336(417) | 121.087(463), 122.275(461)                                     |
| C(2)-C(1)-C(9)                  | 119.950(424) | 122.276(472), 121.821(466)                                     |

|                                                                                                               |              |                            |
|---------------------------------------------------------------------------------------------------------------|--------------|----------------------------|
| C(3)-C(4)-C(7)                                                                                                | 120.292(507) | 119.340(528), 119.540(491) |
| <b>Dihedral Angles(<sup>o</sup>)</b>                                                                          |              |                            |
| Between two dithiolene rings                                                                                  | 0.00(12)     | 3.988(42)                  |
| Dithiolene ring and trifluoromethylphenyl ring                                                                | 34.504(123)  | 34.616(130), 17.225(128)   |
| <sup>a</sup> For the atom label, please refer to Figure S5a.                                                  |              |                            |
| <sup>b</sup> Two values are reported since the [1] <sup>-</sup> anion does not lie about an inversion centre. |              |                            |
| <sup>c</sup> #1 label in S(2)#1 indicates that this atom is at equivalent position (1-x, 1-y, -z).            |              |                            |

## 6. FET fabrication and characterization of **1**

FET devices were fabricated with a top-contact configuration. A heavily doped n-type Si wafer with a 300 nm-thick layer of thermally grown SiO<sub>2</sub> and a capacitance of 10 nF cm<sup>-2</sup> was used as the gate. OTS and PS were used as a self-assembled surface modifier for SiO<sub>2</sub>, respectively. Thin films of **1** (50 nm) were formed on substrates by high-vacuum evaporation (3×10<sup>-4</sup> Pa). After that, the Au source and drain contacts (50 nm) were deposited onto the organic layer through a shadow mask under high vacuum. The channel length (L) and width (W) were 80 μm and 8800 μm, respectively.

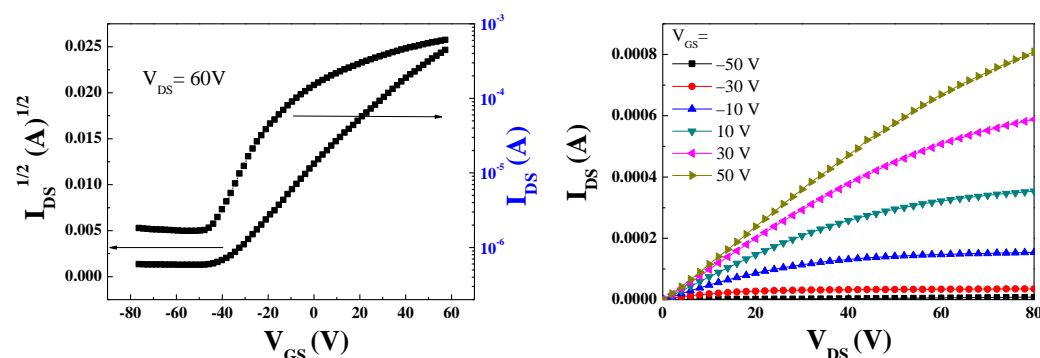

**Figure S6.** I–V characteristics of **1** FET prepared on OTS-SiO<sub>2</sub>/Si substrate deposited at  $T_{\text{sub}} = 70\text{C}^{\circ}$ , under nitrogen atmosphere: a) Plot of  $I_{\text{DS}}$  vs.  $V_{\text{GS}}$  for  $V_{\text{DS}} = 60\text{ V}$ . b) Plot of  $I_{\text{DS}}$  vs.  $V_{\text{DS}}$ .

## 7. Stability testing of **1**



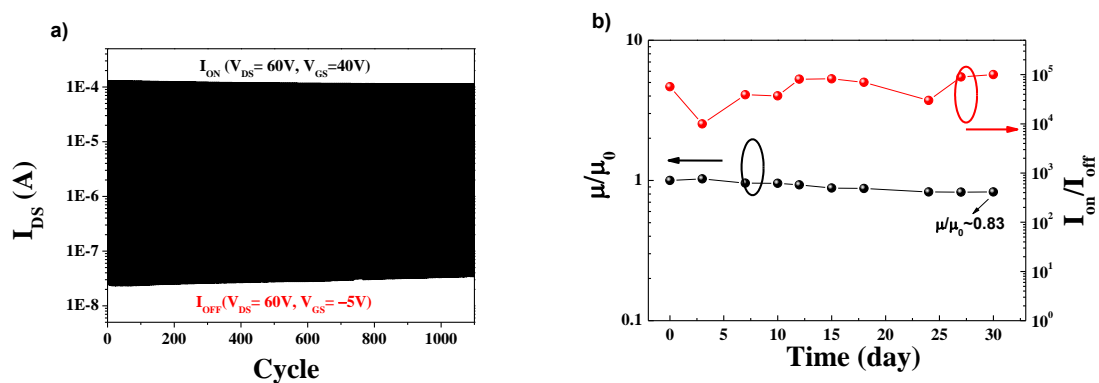

**Figure S7.** a) Stability test of on/off current over 1000 cycles (on PS-SiO<sub>2</sub>/Si substrate). b) Ambient stability test for 30 days (on PS-SiO<sub>2</sub>/Si substrate).

## 8. AFM image and XRD pattern of thin film of 1

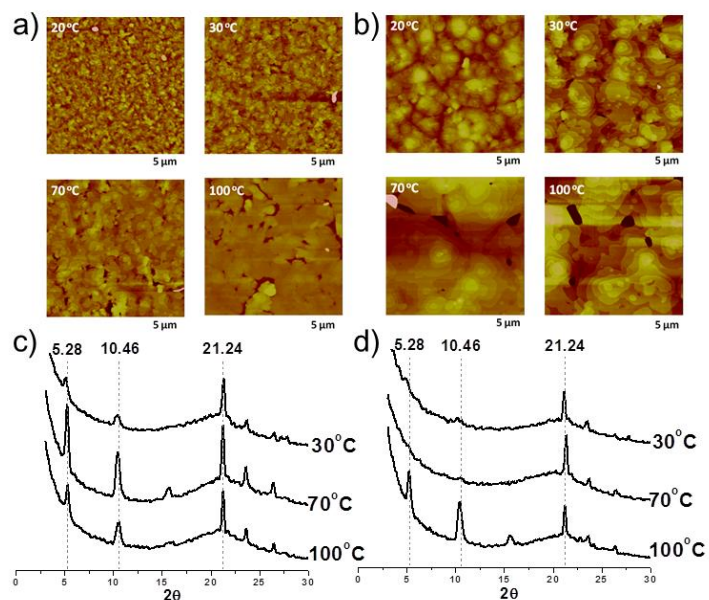

**Figure S8.** AFM images of the thin films of the complex **1**: a) on PS-SiO<sub>2</sub>/Si substrate, b) on OTS-SiO<sub>2</sub>/Si substrate. XRD patterns of the thin films of the complex **1**: c) on PS-SiO<sub>2</sub>/Si substrate, d) on OTS-SiO<sub>2</sub>/Si substrate.
